# Supplementary material for: Elevated Linkage Disequilibrium and Signatures of Soft Sweeps Are Common in Drosophila melanogaster
Source: Oxford University Press journal article supplement (doi:10.1534/genetics.115.184002), 2016-04-21
Supplement: figures1.pdf [file figures1.pdf]

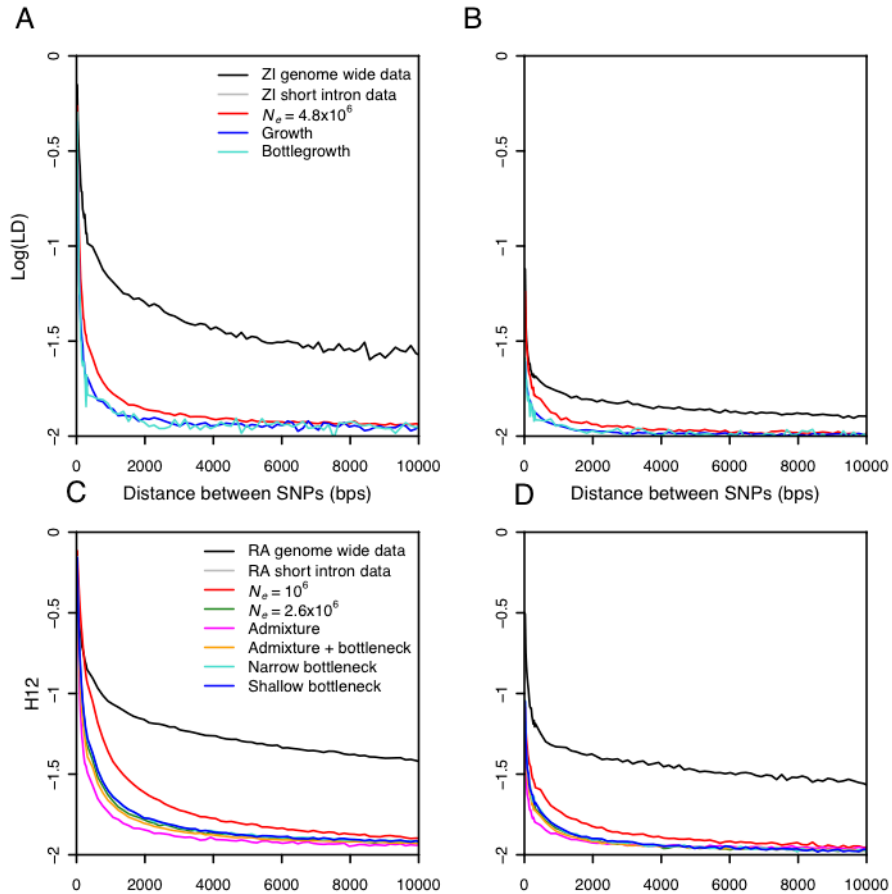

**Figure S1.** Elevation in LD values in Raleigh and Zambian data relative to neutral demographic models. In these panels, minor allele frequencies for SNPs were conditioned on values between 0.3 and 0.5, and 0.0 and 0.05. (A) Zambian (ZI) data and demographic models with MAFs between 0.3 and 0.5. (B) Zambian data and demographic models with MAFs between 0.0 and 0.05. (C) Raleigh (RA) data and demographic models with MAFs between 0.3 and 0.5. (D) Raleigh data and demographic models with MAFs between 0.0 and 0.05.
