# Supplementary material for: Elevated Linkage Disequilibrium and Signatures of Soft Sweeps Are Common in Drosophila melanogaster
Source: Oxford University Press journal article supplement (doi:10.1534/genetics.115.184002), 2016-04-21
Supplement: figures4.pdf [file figures4.pdf]

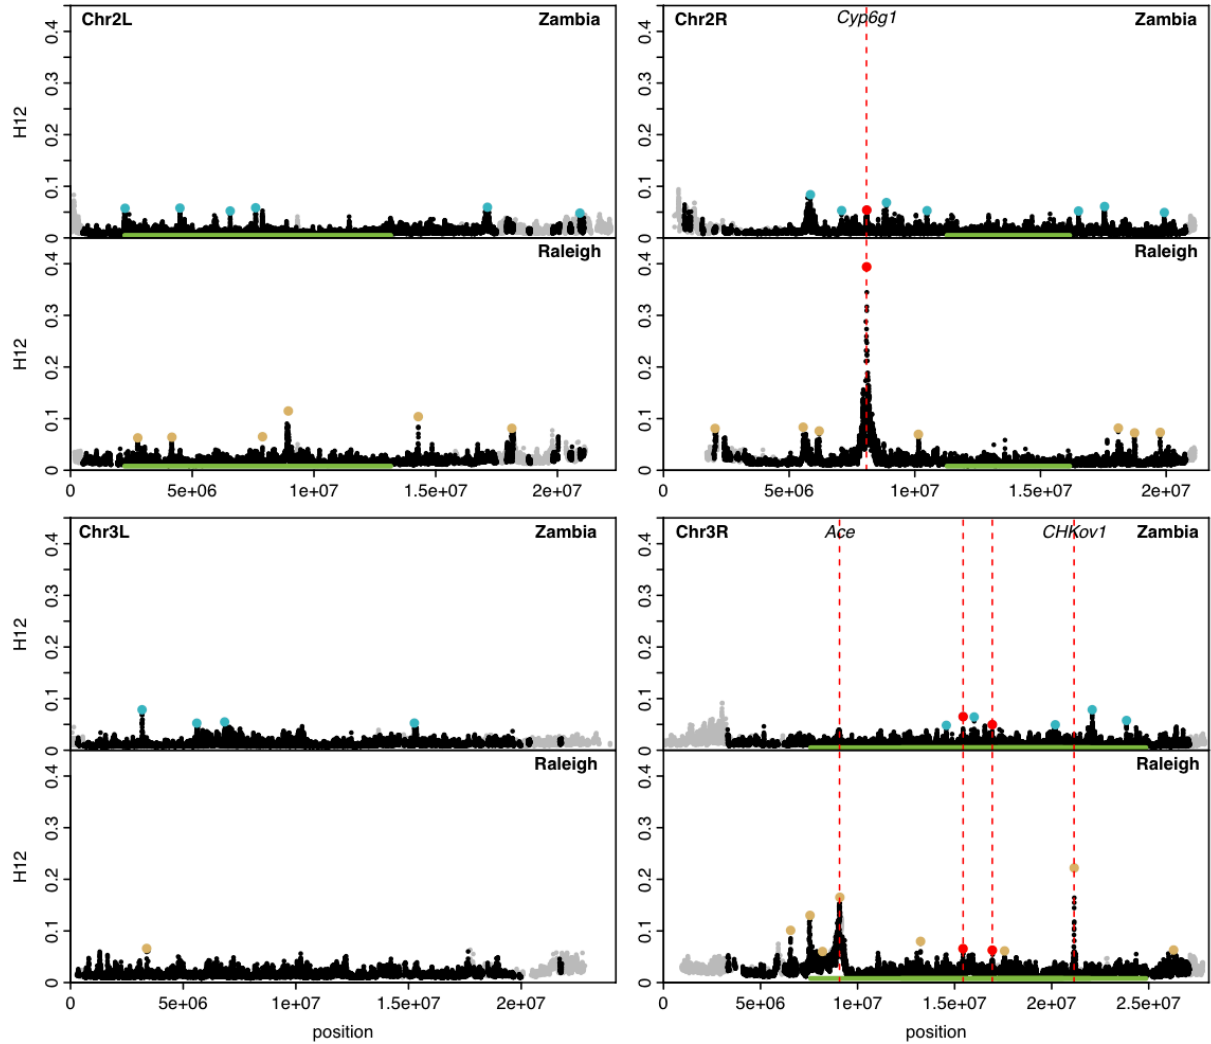

**Figure S4.** H12 scan in Zambian and Raleigh data. This figure is the same as Figure 2, except here the range of the y-axis is the same in both scans.
