# Supplementary material for: Elevated Linkage Disequilibrium and Signatures of Soft Sweeps Are Common in Drosophila melanogaster
Source: Oxford University Press journal article supplement (doi:10.1534/genetics.115.184002), 2016-04-21
Supplement: figures5.pdf [file figures5.pdf]

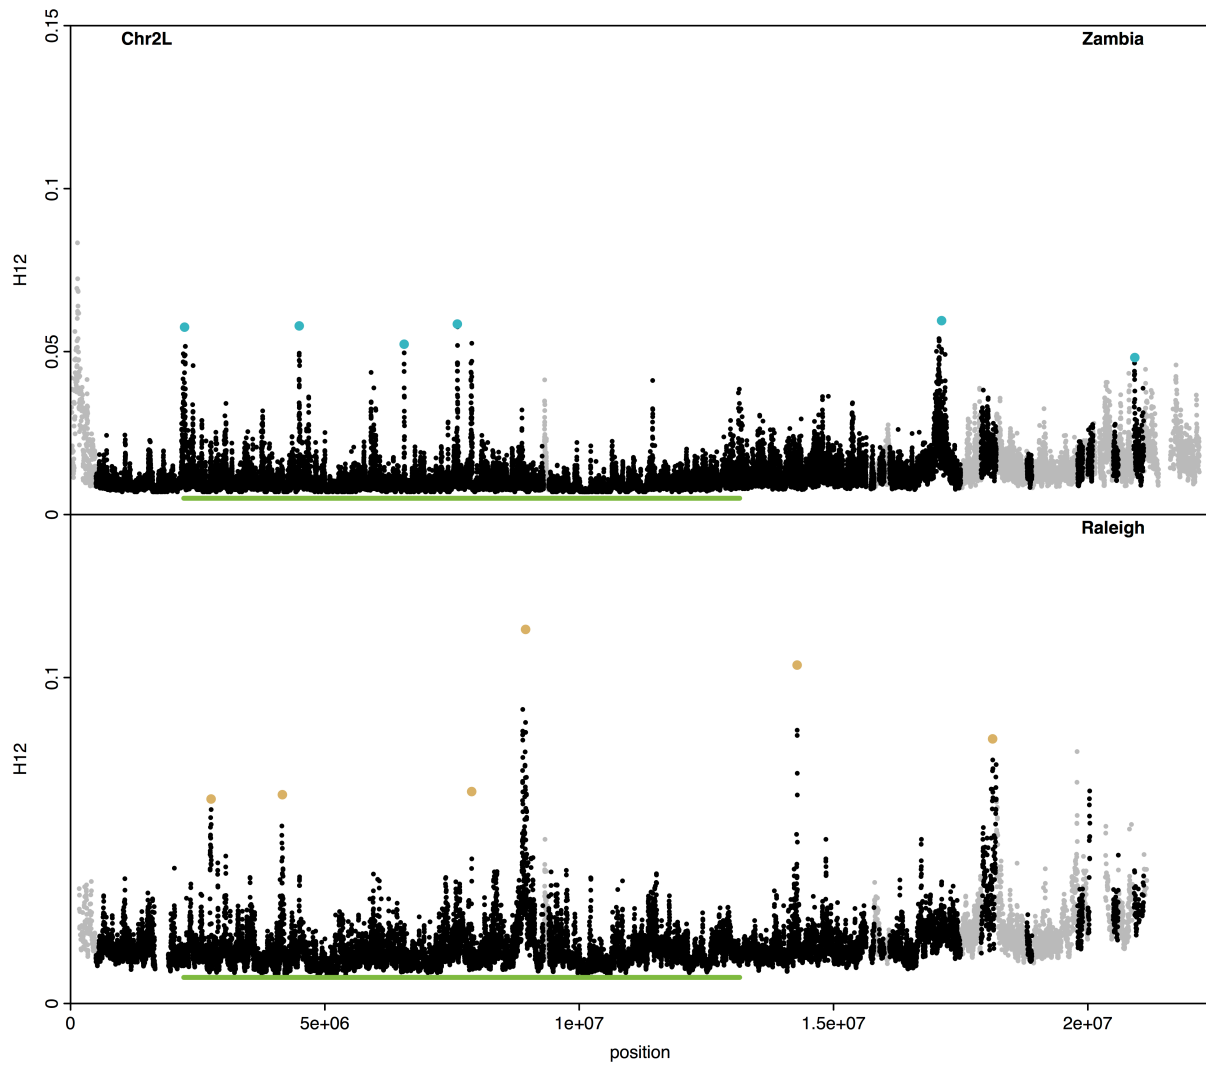

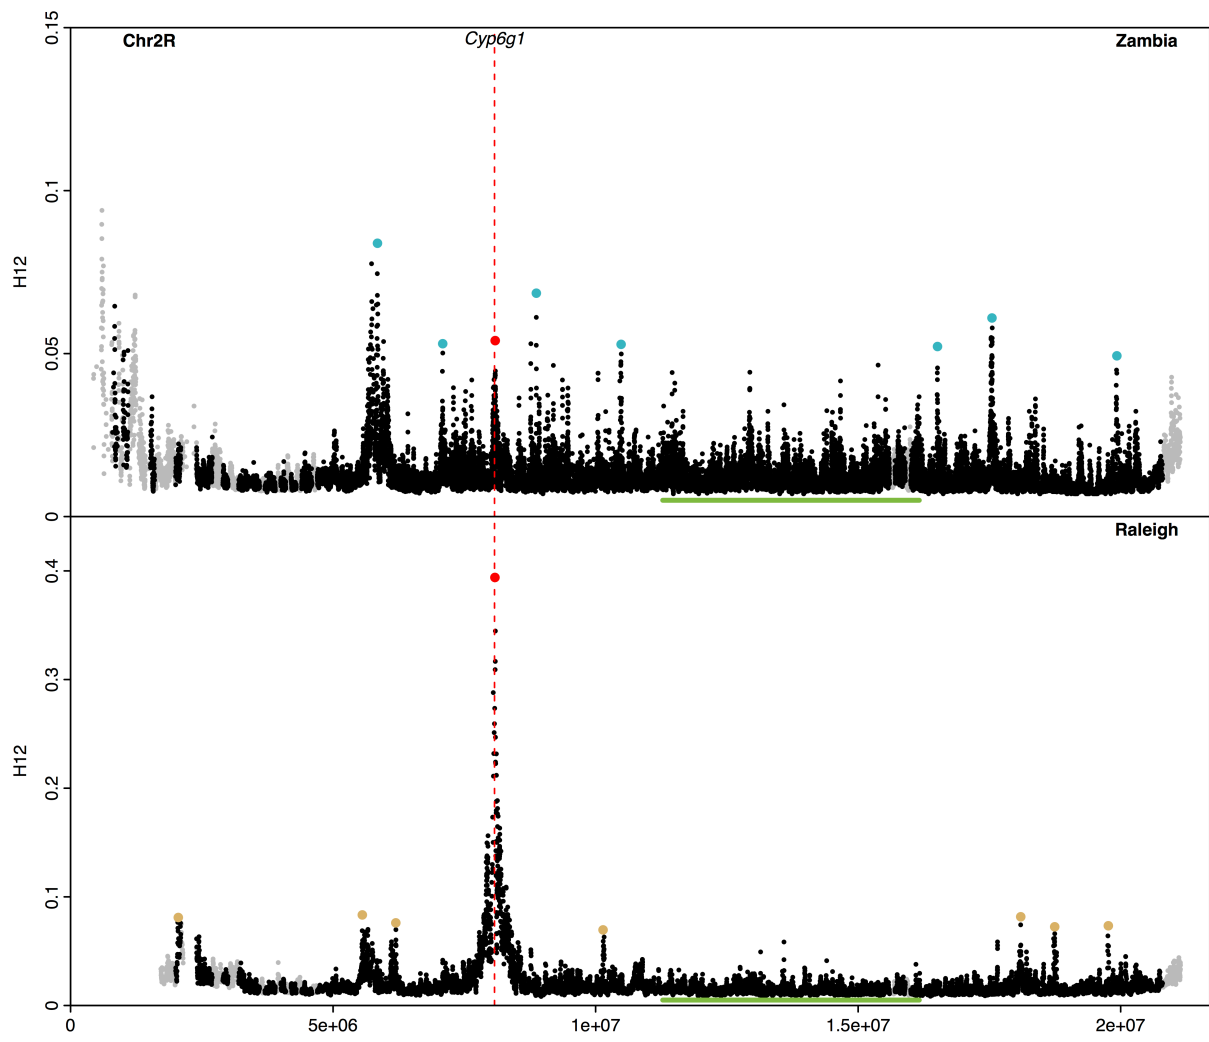

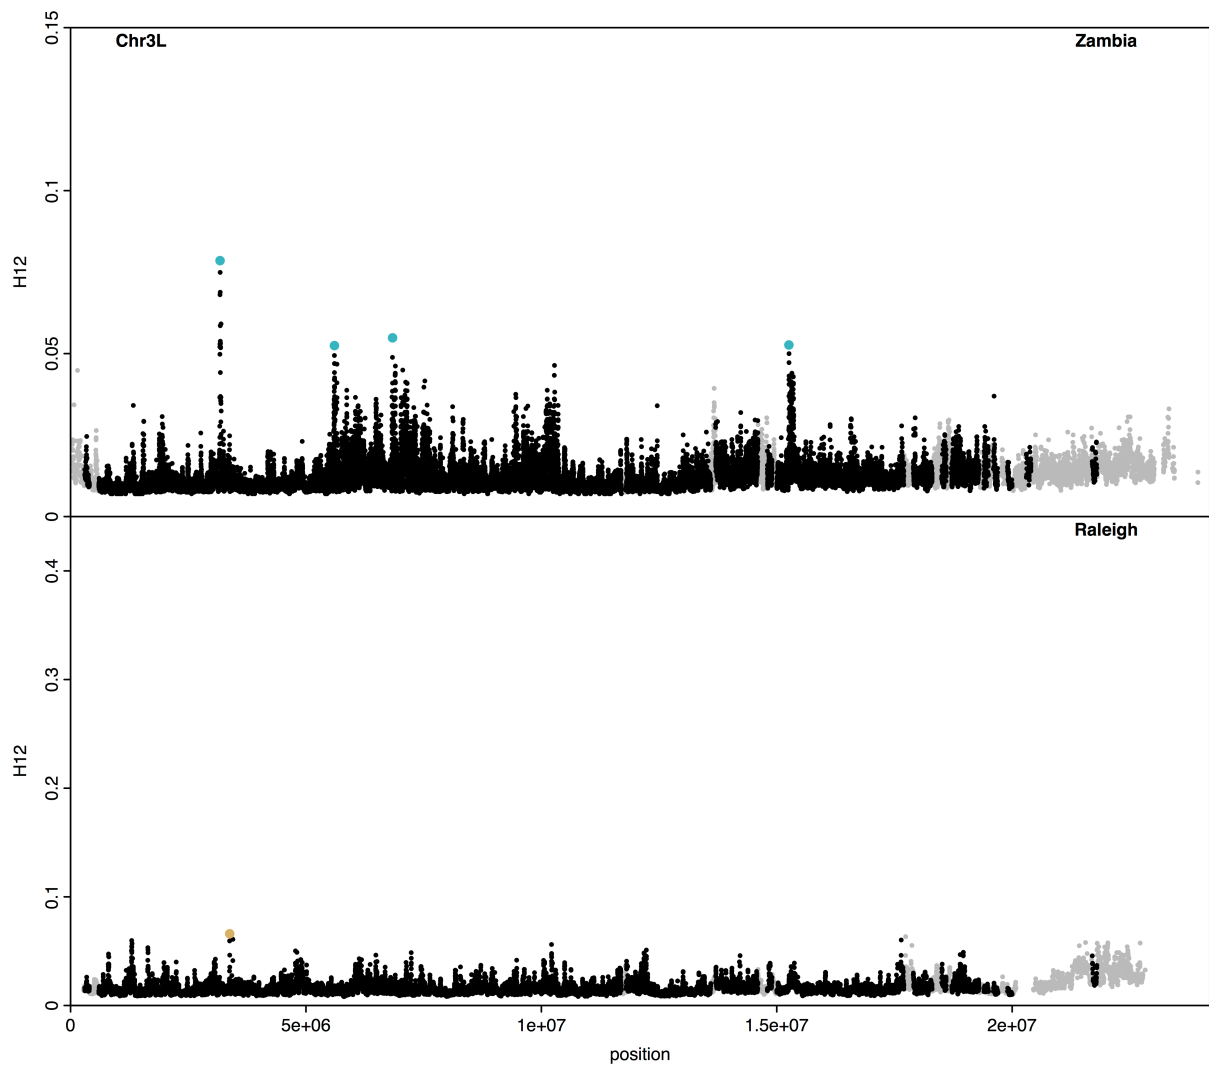

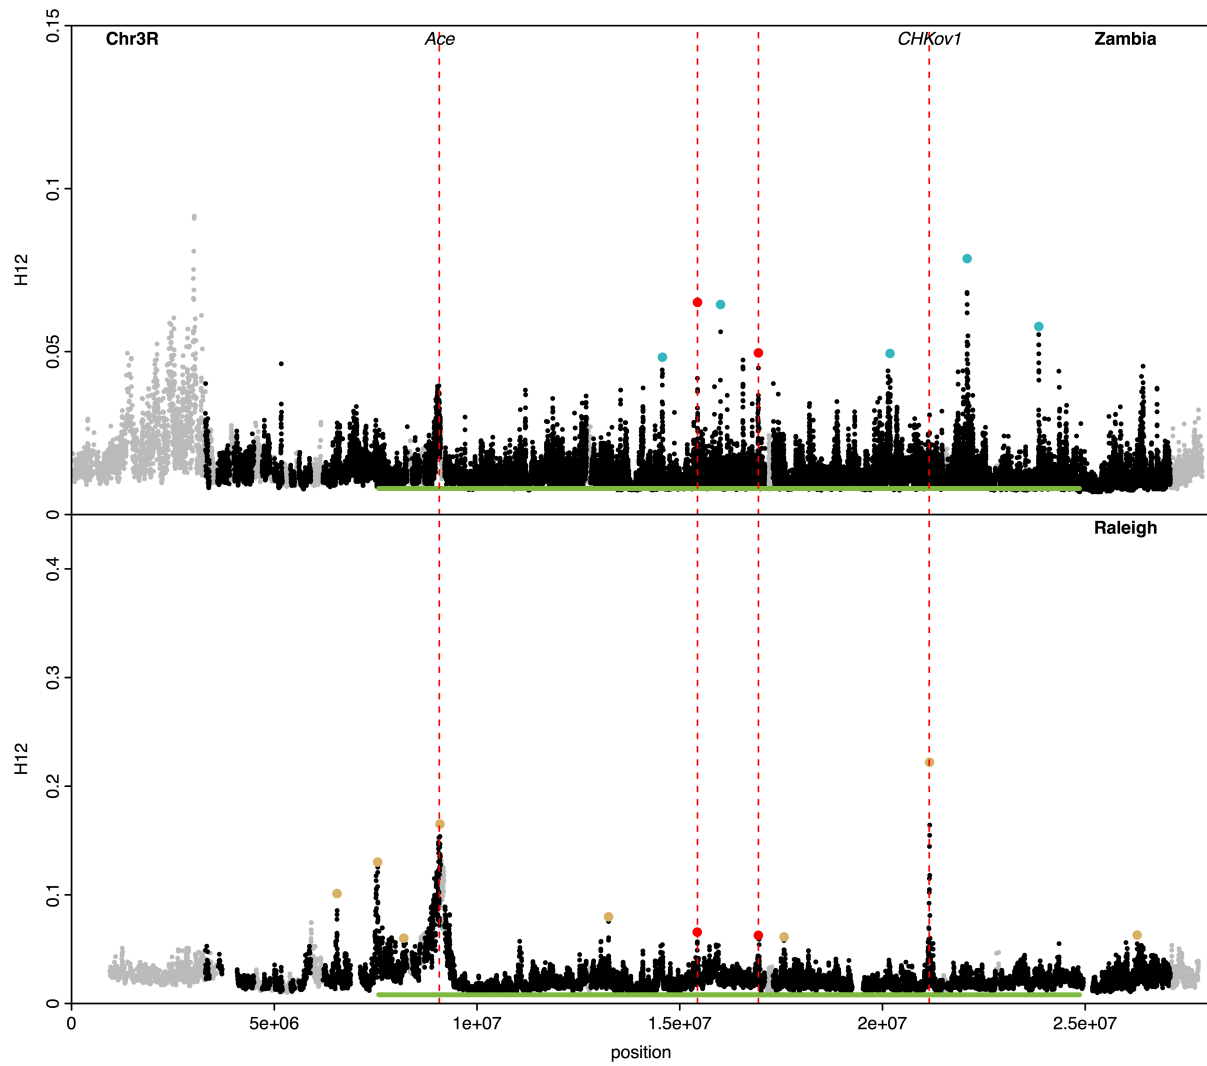

**Figure S5.** H12 scan in Zambian and Raleigh data zoomed in for higher resolution. This figure is the same as Figure 2.
