# Supplementary material for: Elevated Linkage Disequilibrium and Signatures of Soft Sweeps Are Common in Drosophila melanogaster
Source: Oxford University Press journal article supplement (doi:10.1534/genetics.115.184002), 2016-04-21
Supplement: figures6.pdf [file figures6.pdf]

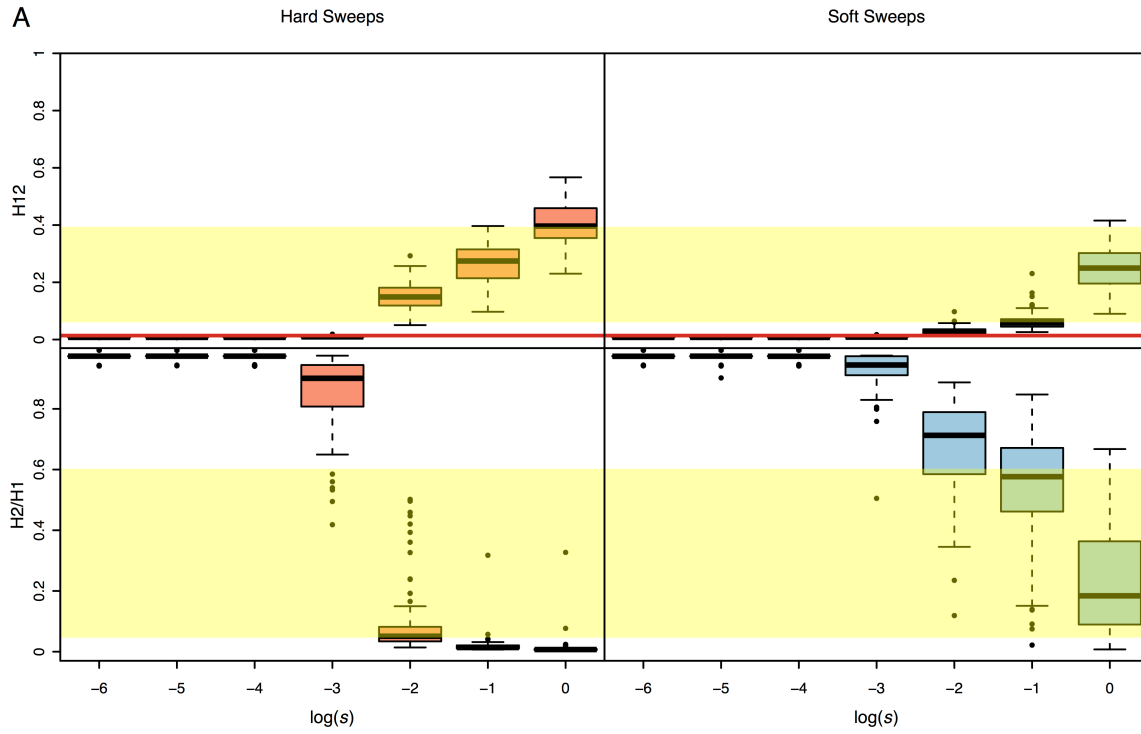

**Figure S6.**  $H_{12}$  and  $H_2/H_1$  measured in sweeps of varying selective strength. Simulations were performed with the same parameters as in Figure 6 except with a higher recombination rate of  $\rho=5$  cM/Mb.
