# Supplementary material for: Elevated Linkage Disequilibrium and Signatures of Soft Sweeps Are Common in Drosophila melanogaster
Source: Oxford University Press journal article supplement (doi:10.1534/genetics.115.184002), 2016-04-21
Supplement: figures7.pdf [file figures7.pdf]

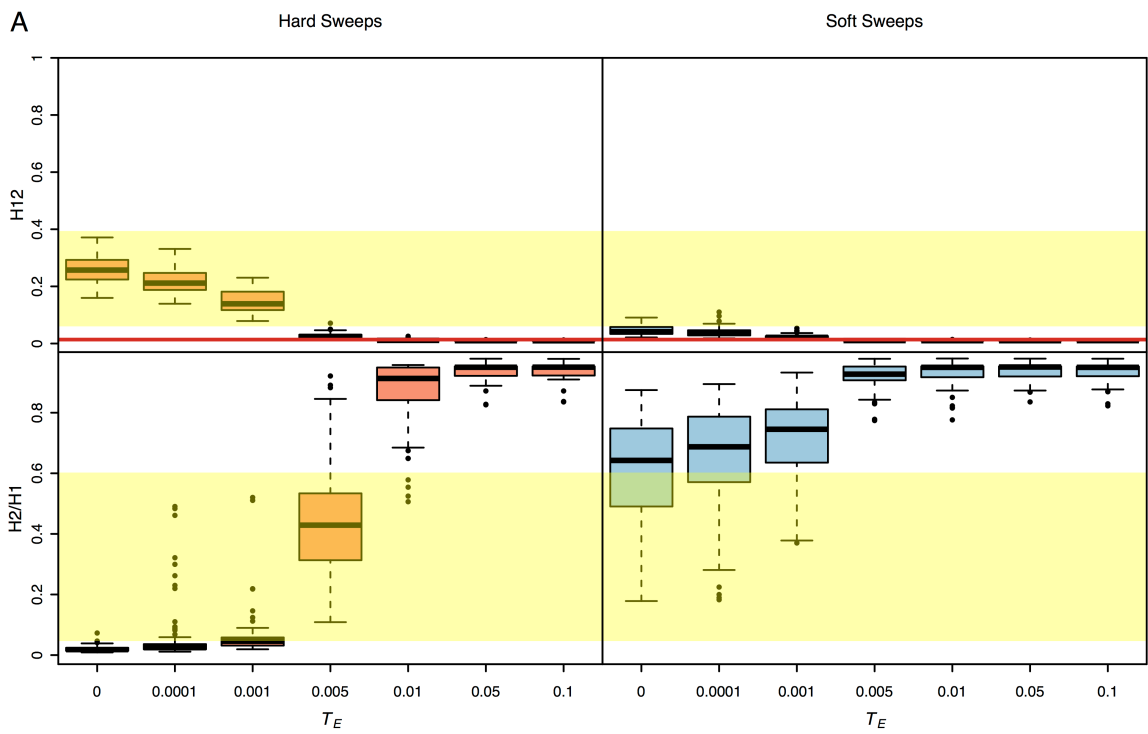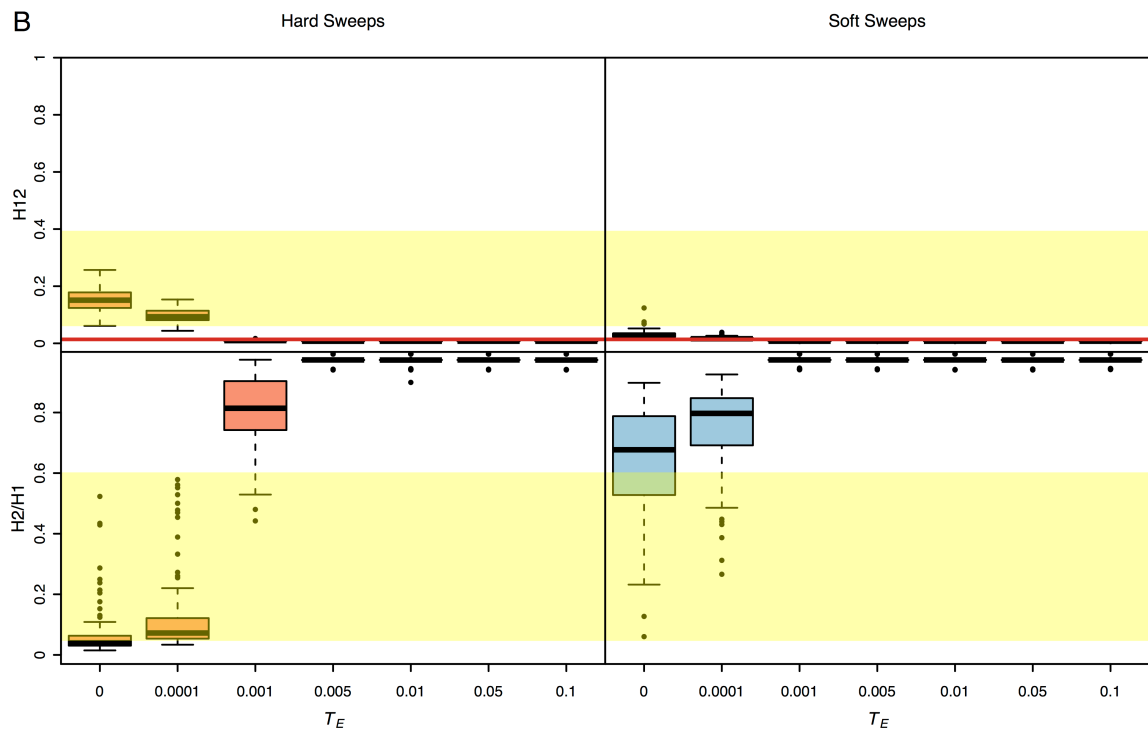

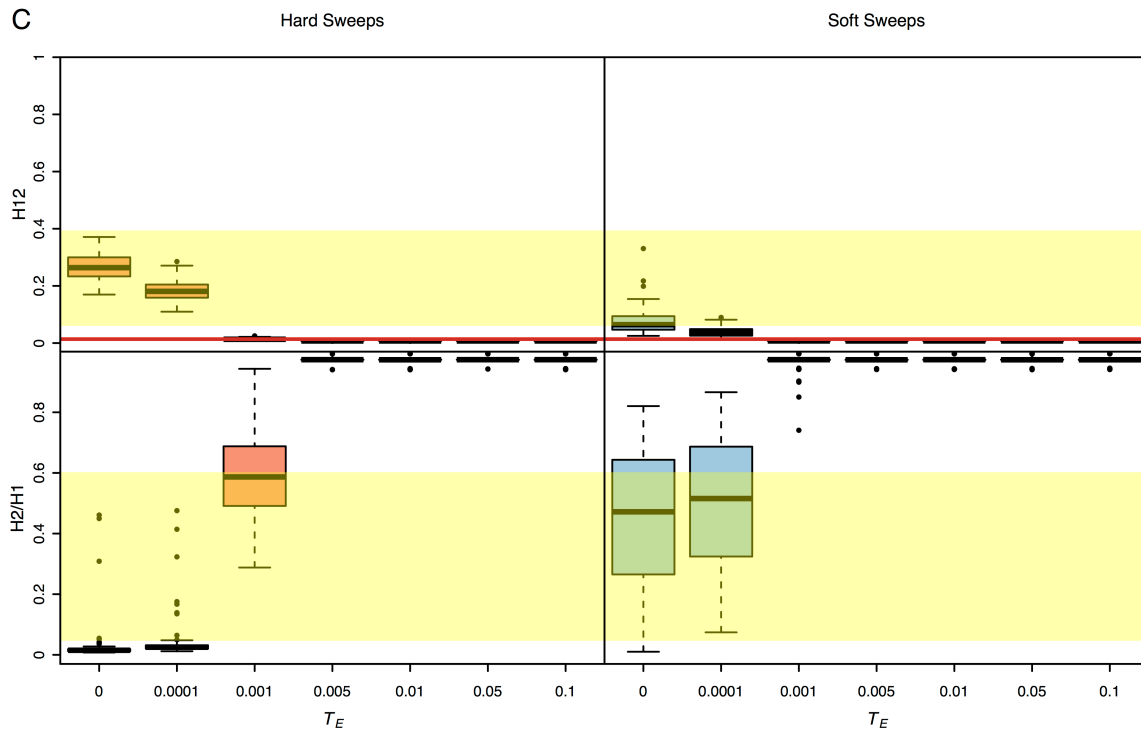

**Figure S7.**  $H12$  and  $H2/H1$  measured in sweeps decayed for varying amounts of time in additional evolutionary scenarios. Simulations were performed with the same parameters as in Figure 7 with some modifications. In (A)  $s=0.01$  and  $\rho=0.5$  cM/Mb. In (B)  $s=0.01$  and  $\rho=5$  cM/Mb. In (C)  $s=0.1$  and  $\rho=5$  cM/Mb.
