# Supplementary material for: Elevated Linkage Disequilibrium and Signatures of Soft Sweeps Are Common in Drosophila melanogaster
Source: Oxford University Press journal article supplement (doi:10.1534/genetics.115.184002), 2016-04-21
Supplement: figures8.pdf [file figures8.pdf]

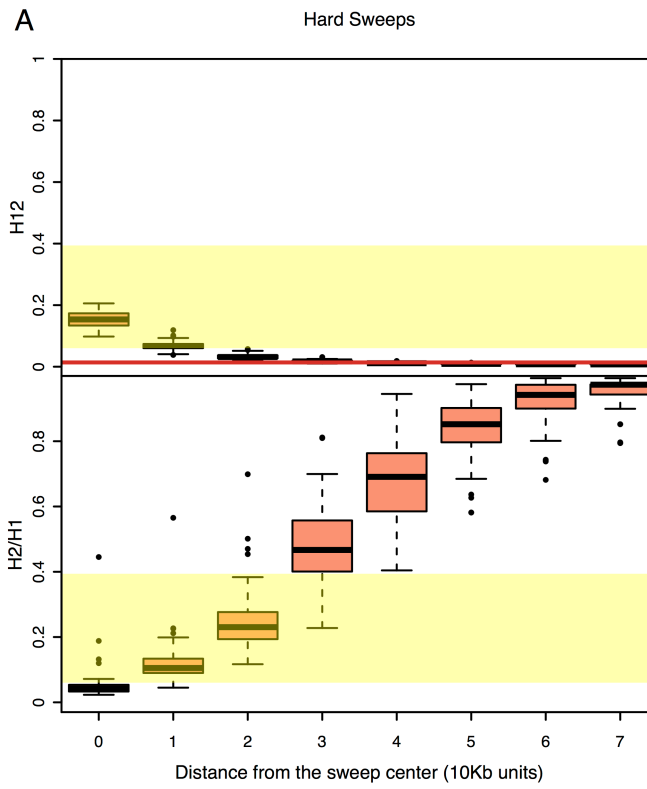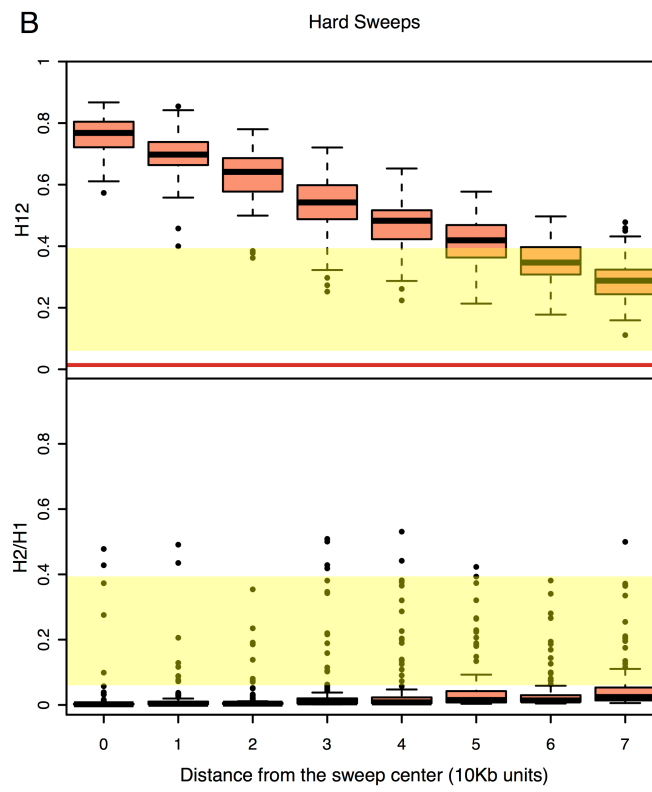

**Figure S8.**  $H_{12}$  and  $H_2/H_1$  measured in hard sweeps at varying distances from the selected site in additional evolutionary scenarios. Simulations were performed with the same parameters as in Figure 8 with some modifications. In (A) the sweeps were decayed for  $0.001 \cdot 4N_e$  generations and the frequency of the adaptive mutation was 0.5 at the time when selection ceased. In (B) sweeps are complete and were sampled when selection ceased without any time for decay. In all scenarios tested, the  $H_{12}$  value at the center of the sweep where the selected site is located is the highest and  $H_2/H_1$  is the lowest.
