# Supplementary material for: Elevated Linkage Disequilibrium and Signatures of Soft Sweeps Are Common in Drosophila melanogaster
Source: Oxford University Press journal article supplement (doi:10.1534/genetics.115.184002), 2016-04-21
Supplement: tables1.pdf [file tables1.pdf]

**Table S1. Demographic parameters inferred by DaDi for models fit to Zambian data.**

Shown are parameter estimates and corresponding log likelihoods (LL) for the bottleneck, bottlegrowth, and growth models inferred by DaDi using Zambian short intron data

GUTENKUNST *et al.* 2009.  $N_B$  represents the bottleneck size,  $N_F$  the final population size,  $T_B$  the duration of the bottleneck, and  $T_F$  the duration of the final population size. For the growth model, both  $N_F$  represents the final population size and  $T$  the time at which growth started. All population size estimates are in terms of units  $4*N_{e_{ancestral}}$  and all time estimates are in terms of units  $2*N_{e_{ancestral}}$ .

**Bottleneck model:**

| $N_B$ | $N_F$ | $T_B$ | $T_F$ | LL       |
|-------|-------|-------|-------|----------|
| 1.402 | 2.940 | 0.203 | 0.048 | -214.476 |

**Bottlegrowth model:**

| $N_B$ | $N_F$ | $T_B$ | $T_F$ | LL       |
|-------|-------|-------|-------|----------|
| 1.465 | 3.388 | 0.128 | 0.116 | -214.376 |

**Growth model:**

| $N_F$ | $T$  | LL      |
|-------|------|---------|
| 2.87  | 0.17 | -228.54 |
