# Supplementary material for: Elevated Linkage Disequilibrium and Signatures of Soft Sweeps Are Common in Drosophila melanogaster
Source: Oxford University Press journal article supplement (doi:10.1534/genetics.115.184002), 2016-04-21
Supplement: tables2.xls [file tables2.xls]

## Sheet: linesIncluded
Table S2. IDs of strains included in the analysis of LD and haplotype homozygosity patterns in the stringently filtered Zambian and Raleigh data sets. We down-sampled the Zambian and Raleigh strains used for the analysis of LD and haplotype homozygosity i
Chr2L, ZI	Chr2R, ZI	Chr3L, ZI	Chr3R, ZI	Chr2L, RA	Chr2R, RA	Chr3L, RA	Chr3R, RA
ZI10	ZI28	ZI28	ZI10	RAL-129	RAL-129	RAL-129	RAL-100
ZI26	ZI31N	ZI31N	ZI27	RAL-136	RAL-136	RAL-136	RAL-101
ZI28	ZI50N	ZI50N	ZI50N	RAL-142	RAL-149	RAL-149	RAL-109
ZI31N	ZI61	ZI61	ZI68	RAL-149	RAL-176	RAL-176	RAL-129
ZI50N	ZI68	ZI68	ZI76	RAL-176	RAL-177	RAL-177	RAL-142
ZI59	ZI76	ZI76	ZI85	RAL-177	RAL-181	RAL-181	RAL-176
ZI85	ZI85	ZI85	ZI91	RAL-181	RAL-208	RAL-208	RAL-177
ZI86	ZI90	ZI90	ZI99	RAL-189	RAL-21	RAL-21	RAL-181
ZI90	ZI99	ZI99	ZI114N	RAL-208	RAL-227	RAL-227	RAL-189
ZI91	ZI104	ZI104	ZI117	RAL-21	RAL-235	RAL-235	RAL-208
ZI99	ZI114N	ZI114N	ZI118N	RAL-223	RAL-256	RAL-256	RAL-223
ZI104	ZI126	ZI126	ZI126	RAL-227	RAL-26	RAL-26	RAL-227
ZI126	ZI157	ZI157	ZI134N	RAL-229	RAL-28	RAL-28	RAL-228
ZI129	ZI161	ZI161	ZI138	RAL-235	RAL-280	RAL-280	RAL-229
ZI134N	ZI164	ZI164	ZI152	RAL-239	RAL-304	RAL-304	RAL-233
ZI138	ZI165	ZI165	ZI161	RAL-28	RAL-307	RAL-307	RAL-235
ZI152	ZI167	ZI167	ZI165	RAL-280	RAL-309	RAL-309	RAL-237
ZI172	ZI170	ZI170	ZI170	RAL-309	RAL-31	RAL-31	RAL-239
ZI176	ZI173	ZI173	ZI172	RAL-31	RAL-315	RAL-315	RAL-256
ZI177	ZI178	ZI178	ZI173	RAL-318	RAL-32	RAL-32	RAL-26
ZI181	ZI181	ZI181	ZI176	RAL-32	RAL-320	RAL-320	RAL-280
ZI184	ZI184	ZI184	ZI178	RAL-320	RAL-324	RAL-324	RAL-301
ZI185	ZI188	ZI188	ZI179	RAL-321	RAL-332	RAL-332	RAL-304
ZI191	ZI190	ZI190	ZI182	RAL-332	RAL-335	RAL-335	RAL-310
ZI194	ZI194	ZI194	ZI184	RAL-335	RAL-340	RAL-340	RAL-315
ZI197N	ZI196	ZI196	ZI185	RAL-348	RAL-348	RAL-348	RAL-318
ZI202	ZI197N	ZI197N	ZI191	RAL-354	RAL-354	RAL-354	RAL-319
ZI210	ZI199	ZI199	ZI193	RAL-357	RAL-357	RAL-357	RAL-320
ZI211	ZI214	ZI214	ZI194	RAL-359	RAL-359	RAL-359	RAL-325
ZI212	ZI219	ZI219	ZI196	RAL-360	RAL-360	RAL-360	RAL-338
ZI214	ZI220	ZI220	ZI206	RAL-361	RAL-361	RAL-361	RAL-348
ZI216N	ZI221	ZI221	ZI210	RAL-362	RAL-362	RAL-362	RAL-356
ZI219	ZI225	ZI225	ZI211	RAL-367	RAL-367	RAL-367	RAL-357
ZI225	ZI227	ZI227	ZI213	RAL-370	RAL-370	RAL-370	RAL-360
ZI228	ZI228	ZI228	ZI219	RAL-371	RAL-371	RAL-371	RAL-362
ZI231	ZI230	ZI230	ZI225	RAL-373	RAL-373	RAL-373	RAL-365
ZI233	ZI231	ZI231	ZI232	RAL-374	RAL-374	RAL-374	RAL-370
ZI237	ZI232	ZI232	ZI235	RAL-375	RAL-375	RAL-375	RAL-371
ZI239	ZI233	ZI233	ZI239	RAL-379	RAL-38	RAL-38	RAL-374
ZI241	ZI239	ZI239	ZI250	RAL-38	RAL-382	RAL-382	RAL-375
ZI250	ZI241	ZI241	ZI251N	RAL-380	RAL-383	RAL-383	RAL-377
ZI252	ZI251N	ZI251N	ZI252	RAL-382	RAL-390	RAL-390	RAL-379
ZI261	ZI252	ZI252	ZI253	RAL-383	RAL-391	RAL-391	RAL-380
ZI264	ZI253	ZI253	ZI254N	RAL-390	RAL-392	RAL-392	RAL-381
ZI267	ZI254N	ZI254N	ZI255	RAL-391	RAL-397	RAL-397	RAL-383
ZI268	ZI263	ZI263	ZI265	RAL-392	RAL-406	RAL-406	RAL-391
ZI273N	ZI264	ZI264	ZI268	RAL-395	RAL-41	RAL-41	RAL-395
ZI286	ZI279	ZI279	ZI271	RAL-397	RAL-42	RAL-42	RAL-40
ZI291	ZI281	ZI281	ZI279	RAL-406	RAL-427	RAL-427	RAL-405
ZI293	ZI284	ZI284	ZI281	RAL-42	RAL-437	RAL-437	RAL-406
ZI295	ZI291	ZI291	ZI286	RAL-427	RAL-440	RAL-440	RAL-42
ZI296	ZI292	ZI292	ZI303	RAL-437	RAL-441	RAL-441	RAL-426
ZI303	ZI296	ZI296	ZI311N	RAL-439	RAL-48	RAL-48	RAL-427
ZI311N	ZI311N	ZI311N	ZI316	RAL-440	RAL-486	RAL-486	RAL-437
ZI314	ZI314	ZI314	ZI320	RAL-441	RAL-491	RAL-491	RAL-441
ZI319	ZI320	ZI320	ZI324	RAL-461	RAL-492	RAL-492	RAL-461
ZI320	ZI324	ZI324	ZI329	RAL-48	RAL-502	RAL-502	RAL-486
ZI324	ZI329	ZI329	ZI332	RAL-491	RAL-505	RAL-505	RAL-491
ZI329	ZI332	ZI332	ZI335	RAL-492	RAL-508	RAL-508	RAL-492
ZI332	ZI333	ZI333	ZI336	RAL-505	RAL-509	RAL-509	RAL-502
ZI333	ZI335	ZI335	ZI342	RAL-508	RAL-513	RAL-513	RAL-505
ZI335	ZI336	ZI336	ZI344	RAL-509	RAL-517	RAL-517	RAL-508
ZI341	ZI341	ZI341	ZI348	RAL-513	RAL-530	RAL-530	RAL-509
ZI344	ZI342	ZI342	ZI357N	RAL-517	RAL-535	RAL-535	RAL-513
ZI351	ZI344	ZI344	ZI358	RAL-530	RAL-551	RAL-551	RAL-517
ZI359	ZI352	ZI352	ZI364	RAL-535	RAL-555	RAL-555	RAL-528
ZI362	ZI353	ZI353	ZI370	RAL-551	RAL-559	RAL-559	RAL-530
ZI364	ZI358	ZI358	ZI373	RAL-555	RAL-566	RAL-566	RAL-531
ZI370	ZI362	ZI362	ZI374	RAL-566	RAL-584	RAL-584	RAL-535
ZI373	ZI368	ZI368	ZI377	RAL-57	RAL-596	RAL-596	RAL-555
ZI377	ZI370	ZI370	ZI378	RAL-589	RAL-634	RAL-634	RAL-57
ZI378	ZI373	ZI373	ZI386	RAL-596	RAL-639	RAL-639	RAL-589
ZI379	ZI379	ZI379	ZI392	RAL-69	RAL-642	RAL-642	RAL-596
ZI380	ZI381	ZI381	ZI395	RAL-703	RAL-69	RAL-69	RAL-639
ZI381	ZI384	ZI384	ZI398	RAL-705	RAL-703	RAL-703	RAL-642
ZI384	ZI392	ZI392	ZI402	RAL-707	RAL-705	RAL-705	RAL-69
ZI386	ZI398	ZI398	ZI418N	RAL-716	RAL-707	RAL-707	RAL-705
ZI392	ZI402	ZI402	ZI420	RAL-721	RAL-714	RAL-714	RAL-707
ZI398	ZI405	ZI405	ZI421	RAL-727	RAL-716	RAL-716	RAL-714
ZI400	ZI418N	ZI418N	ZI431	RAL-732	RAL-721	RAL-721	RAL-721
ZI402	ZI420	ZI420	ZI433	RAL-737	RAL-727	RAL-727	RAL-727
ZI413	ZI429	ZI429	ZI444	RAL-75	RAL-732	RAL-732	RAL-75
ZI418N	ZI433	ZI433	ZI445	RAL-757	RAL-748	RAL-748	RAL-757
ZI420	ZI443	ZI443	ZI447	RAL-761	RAL-75	RAL-75	RAL-761
ZI429	ZI445	ZI445	ZI453	RAL-787	RAL-757	RAL-757	RAL-765
ZI431	ZI447	ZI447	ZI455N	RAL-805	RAL-776	RAL-776	RAL-786
ZI433	ZI453	ZI453	ZI456	RAL-808	RAL-799	RAL-799	RAL-796
ZI437	ZI455N	ZI455N	ZI457	RAL-819	RAL-805	RAL-805	RAL-805
ZI447	ZI457	ZI457	ZI458	RAL-820	RAL-808	RAL-808	RAL-819
ZI448	ZI458	ZI458	ZI460	RAL-837	RAL-812	RAL-812	RAL-820
ZI455N	ZI460	ZI460	ZI466	RAL-850	RAL-819	RAL-819	RAL-837
ZI457	ZI471	ZI471	ZI468	RAL-861	RAL-820	RAL-820	RAL-843
ZI460	ZI472	ZI472	ZI471	RAL-884	RAL-822	RAL-822	RAL-849
ZI466	ZI477	ZI477	ZI477	RAL-890	RAL-837	RAL-837	RAL-859
ZI468	ZI486	ZI486	ZI488	RAL-892	RAL-843	RAL-843	RAL-887
ZI476	ZI490	ZI490	ZI490	RAL-894	RAL-861	RAL-861	RAL-890
ZI477	ZI504	ZI504	ZI491	RAL-897	RAL-884	RAL-884	RAL-897
ZI490	ZI508	ZI508	ZI504	RAL-900	RAL-890	RAL-890	RAL-908
ZI491	ZI514N	ZI514N	ZI517	RAL-908	RAL-897	RAL-897	RAL-91
ZI508	ZI517	ZI517	ZI527	RAL-93	RAL-93	RAL-93	RAL-93
