# Supplementary material for: Elevated Linkage Disequilibrium and Signatures of Soft Sweeps Are Common in Drosophila melanogaster
Source: Oxford University Press journal article supplement (doi:10.1534/genetics.115.184002), 2016-04-21
Supplement: tables3.pdf [file tables3.pdf]

**Table S3. Test for elevation in LD within 100 Kb of inversion breakpoints.**

| <b>Population</b> | <b>Mean LD of SNP pairs within 100 Kb of inversion break points</b> | <b>Mean LD of SNP pairs beyond 100 Kb of inversion break points</b> |
|-------------------|---------------------------------------------------------------------|---------------------------------------------------------------------|
| Zambia            | 0.0253                                                              | 0.0268                                                              |
| Raleigh           | 0.0610                                                              | 0.0602                                                              |

Shown are mean LD values calculated for 100,000 randomly sampled SNP pairs within and beyond 100 Kb of inversion break points, which were identified in CORBETT-DETIG AND HARTL 2012; HUANG *et al.* 2014; LACK *et al.* 2015. The differences in mean values are biologically insignificant.
