# Supplementary material for: Elevated Linkage Disequilibrium and Signatures of Soft Sweeps Are Common in Drosophila melanogaster
Source: Oxford University Press journal article supplement (doi:10.1534/genetics.115.184002), 2016-04-21
Supplement: tables4.pdf [file tables4.pdf]

**Table S4. Top 25 peaks in the Zambian (A) and Raleigh (B) data.** Listed are the coordinates of the center of the analysis window with the highest H12 value in a peak, the edge coordinates of each peak, and the corresponding H12 and H2/H1 values in the analysis window.

**(A) Zambia**

| Chromosome | Start of peak | End of peak | Center of peak | H12   | H2/H1 |
|------------|---------------|-------------|----------------|-------|-------|
| Chr2R      | 5689984       | 5877052     | 5845467        | 0.084 | 0.448 |
| Chr3R      | 22074333      | 22099126    | 22087580       | 0.079 | 0.106 |
| Chr3L      | 3143696       | 3207496     | 3175369        | 0.079 | 0.106 |
| Chr2R      | 8858953       | 8877924     | 8871146        | 0.069 | 0.210 |
| Chr3R      | 15430749      | 15451721    | 15437579       | 0.065 | 0.591 |
| Chr3R      | 15997772      | 16011492    | 16006285       | 0.064 | 0.132 |
| Chr2R      | 17495878      | 17569226    | 17549291       | 0.061 | 0.151 |
| Chr2L      | 16962865      | 17287118    | 17124919       | 0.060 | 0.368 |
| Chr2L      | 7595364       | 7622463     | 7603947        | 0.058 | 0.156 |
| Chr2L      | 4481025       | 4519970     | 4495822        | 0.058 | 0.208 |
| Chr3R      | 23843073      | 23866972    | 23856074       | 0.058 | 0.143 |
| Chr2L      | 2224927       | 2247036     | 2241538        | 0.058 | 0.125 |
| Chr3L      | 6820734       | 6858547     | 6839441        | 0.055 | 0.141 |
| Chr2R      | 8072574       | 8129240     | 8087869        | 0.054 | 0.345 |
| Chr2R      | 7075343       | 7105539     | 7088009        | 0.053 | 0.407 |
| Chr2R      | 10472210      | 10508206    | 10485863       | 0.053 | 0.449 |
| Chr3L      | 15243946      | 15273825    | 15258107       | 0.053 | 0.592 |
| Chr3L      | 5576197       | 5623343     | 5604719        | 0.052 | 0.222 |
| Chr2L      | 6551349       | 6571793     | 6558631        | 0.052 | 0.194 |
| Chr2R      | 16497602      | 16522034    | 16512033       | 0.052 | 0.274 |
| Chr3R      | 16920082      | 16949847    | 16940157       | 0.050 | 0.266 |
| Chr3R      | 20157200      | 20203615    | 20186573       | 0.049 | 0.262 |
| Chr2R      | 19900056      | 19941093    | 19927955       | 0.049 | 0.167 |
| Chr3R      | 14551505      | 14588594    | 14572745       | 0.048 | 0.622 |

|       |          |          |          |       |       |
|-------|----------|----------|----------|-------|-------|
| Chr2L | 20855660 | 21041236 | 20923022 | 0.048 | 0.671 |
|-------|----------|----------|----------|-------|-------|

**(B) Raleigh**

| Chromosome | Start of peak | End of peak | Center of peak | H12   | H2/H1 |
|------------|---------------|-------------|----------------|-------|-------|
| Chr2R      | 7723122       | 8452931     | 8082481        | 0.394 | 0.046 |
| Chr3R      | 21100160      | 21196327    | 21161195       | 0.222 | 0.388 |
| Chr3R      | 8561176       | 9347112     | 9084900        | 0.165 | 0.338 |
| Chr3R      | 7441836       | 7656600     | 7549332        | 0.130 | 0.098 |
| Chr2L      | 8787750       | 8981351     | 8946244        | 0.115 | 0.524 |
| Chr2L      | 14260585      | 14297414    | 14284521       | 0.104 | 0.330 |
| Chr3R      | 6503887       | 6568950     | 6548287        | 0.101 | 0.149 |
| Chr2R      | 5488736       | 5706118     | 5556716        | 0.083 | 0.558 |
| Chr2R      | 18048793      | 18139982    | 18096795       | 0.082 | 0.501 |
| Chr2L      | 18066440      | 18156804    | 18128033       | 0.081 | 0.229 |
| Chr2R      | 1980165       | 2741000     | 2051987        | 0.081 | 0.516 |
| Chr3R      | 13235515      | 13272233    | 13244854       | 0.080 | 0.580 |
| Chr2R      | 6158540       | 6220781     | 6194741        | 0.076 | 0.524 |
| Chr2R      | 19741265      | 19784611    | 19765222       | 0.073 | 0.179 |
| Chr2R      | 18730636      | 18755472    | 18743856       | 0.072 | 0.326 |
| Chr2R      | 10116253      | 10172867    | 10141807       | 0.070 | 0.602 |
| Chr3L      | 3361643       | 3387951     | 3379415        | 0.066 | 0.305 |
| Chr3R      | 15417427      | 15448395    | 15431116       | 0.066 | 0.555 |
| Chr2L      | 7874465       | 7898299     | 7886142        | 0.065 | 0.386 |
| Chr2L      | 4146117       | 4176261     | 4164595        | 0.064 | 0.409 |
| Chr3R      | 26262373      | 26301949    | 26281108       | 0.063 | 0.566 |
| Chr3R      | 16908455      | 16953298    | 16939738       | 0.063 | 0.245 |
| Chr2L      | 2735006       | 2781702     | 2762777        | 0.063 | 0.313 |
| Chr3R      | 17548069      | 17614825    | 17573640       | 0.061 | 0.480 |
| Chr3R      | 8113141       | 8551014     | 8193336        | 0.060 | 0.413 |
